# Supplementary material for: Self-DNA Exposure Induces Developmental Defects and Germline DNA Damage Response in Caenorhabditis elegans
Source: MDPI journal article supplement (doi:10.3390/biology11020262), 2022-02-08
Supplement: s1 [file s1]

# Self-DNA Exposure Induces Developmental Defects and Germline DNA Damage Response in *Caenorhabditis elegans*

Marcello Germoglio, Adele Adamo, Guido Incerti, Fabrizio Carteni, Silvia Gigliotti, Aurora Storlazzi and Stefano Mazzoleni

## Supplementary Materials:

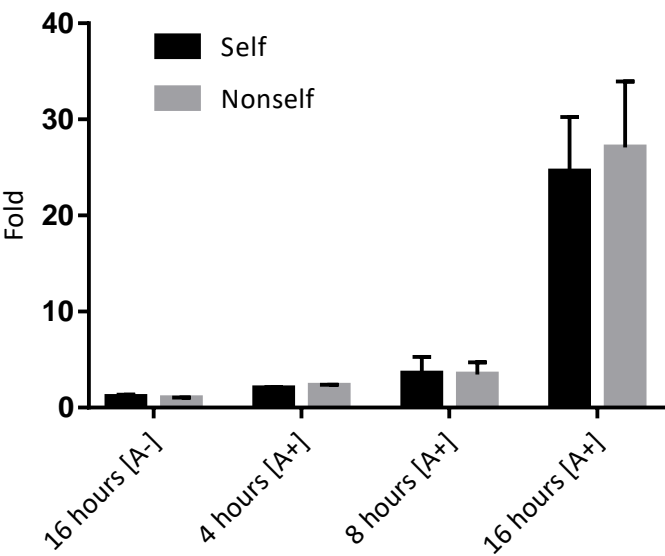

**Scheme S1. Fosmid copy number increased upon addition of L-arabinose.** The graph shows the fold change (relative copy number of fosmids) in *C. elegans* and *Medicago truncatula* libraries grown 4hrs, 8hrs, 16 hrs in LB supplemented with L-arabinose [A+]. Bars indicate standard deviation from 3 technical replicates.

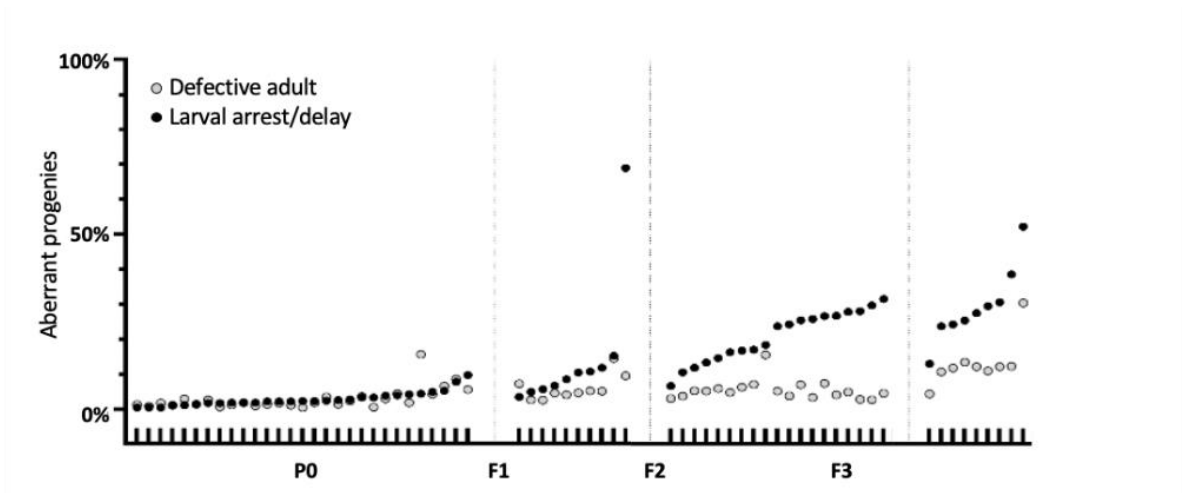

**Scheme S2. Separation of larval arrests/delays and defective adults across generations.** The x-axis indicates parental worms in each generation (comb teeth) fed on self library. The y-axis reports the percentages of defective adults (black) and larval arrests/delays (grey) per worm.

**Supplementary Table S1. Effects of parental feeding treatments on the occurrence of embryonic lethality and aberrant phenotypes in the progeny of *C. elegans* (see Fig. 1a-b in main text).** For each treatment and effect, data refer to median and interquartile range of percent frequency of the effect, calculated on the F<sub>1</sub> progeny of a variable number (N) of randomized, replicated worms. Results of statistical analyses testing for overall treatment effect, as well as for pairwise effect comparisons between Self and either other treatments are also shown, as P values resulting from Kruskal-Wallis ANOVA and Mann-Whitney U tests, respectively.

| Effects                    | Treatment             |    |                       |    |                       |    | Statistical analysis |                         |                       |
|----------------------------|-----------------------|----|-----------------------|----|-----------------------|----|----------------------|-------------------------|-----------------------|
|                            | Self                  | N  | Self [A-]             | N  | Nonself               | N  | P<br>(K-W ANOVA)     | P<br>(Self = Self [A-]) | P<br>(Self = Nonself) |
| Embryonic lethality<br>(%) | 2.64<br>(2.15 ÷ 4.31) | 15 | 0.51<br>(0.32 ÷ 0.63) | 10 | 0.70<br>(0.64 ÷ 1.08) | 10 | < 0.00001            | 0.00016                 | 0.00059               |
| Aberrant phenotypes<br>(%) | 3.86<br>(2.63 ÷ 9.09) | 15 | 0.38<br>(0.32 ÷ 0.65) | 10 | 0.96<br>(0.72 ÷ 1.04) | 10 | < 0.00001            | 0.00032                 | 0.00040               |

| Effects                    | Treatment             |   |                       |    | Statistical analysis      |                       |
|----------------------------|-----------------------|---|-----------------------|----|---------------------------|-----------------------|
|                            | OP50                  | N | Self-subset           | N  | P<br>(Self = Self-subset) | P<br>(Nonself = OP50) |
| Embryonic lethality<br>(%) | 1.02<br>(0.61 ÷ 1.20) | 8 | 2.30<br>(1.61 ÷ 3.54) | 16 | 0.34278                   | 0.53396               |
| Aberrant phenotypes<br>(%) | 0.20<br>(0.00 ÷ 0.80) | 8 | 3.48<br>(2.52 ÷ 4.86) | 16 | 0.46456                   | 0.25198               |

**Supplementary Table S2. List of fosmids of the *C. elegans* library (self subset) used in Figure 1**

| Chromosome | Clone       | Clone size | Clone start | Clone end |
|------------|-------------|------------|-------------|-----------|
| I          |             |            |             |           |
|            | WRM0610bA07 | 31172      | 7230131     | 7261303   |
| I          | WRM0610aA11 | 34068      | 7974014     | 8008082   |
| II         |             |            |             |           |
|            | WRM0610aA05 | 34429      | 4905085     | 4939514   |
| II         | WRM0610aA04 | 19714      | 8289863     | 8309577   |
| II         | WRM0610bA11 | 33968      | 12465047    | 12499015  |
| III        | WRM0610bA10 | 27446      | 137548      | 164994    |

|     |             |       |          |          |
|-----|-------------|-------|----------|----------|
| III | WRM0610aA09 | 32802 | 6044368  | 6077170  |
| III | WRM0610aA10 | 34196 | 6488679  | 6522875  |
| IV  | WRM0610bA01 | 35823 | 1511885  | 1547708  |
| IV  | WRM0610dA01 | 34487 | 4234121  | 4268608  |
| IV  | WRM0610bA06 | 37647 | 11539101 | 11576748 |
| V   | WRM0610aA08 | 23116 | 5071293  | 5094409  |
| V   | WRM0610aA06 | 30838 | 7113128  | 7143966  |
| X   | WRM0610bA04 | 35806 | 1144437  | 1180243  |
| X   | WRM0610aA12 | 30483 | 8624052  | 8654535  |
| X   | WRM0610cA02 | 33998 | 12671842 | 12705840 |
| X   | WRM0610aA03 | 29543 | 12732166 | 12761709 |

**Supplementary Table S3. Phenotypes of defective adults.**

Abnormal body length and shape: Sma and Lon (worms that have shorter or longer body lengths compared to wt); Dpy (worms short and fat, dumpy).

Abnormal vulva / gonad: Vul: worms that showed an abnormal development of the vulva (vulva-less or protruding vulva); Muv (the worms have two or more vulva, multi-vulva); Gon (worms with abnormal gonad development. The gonad appears with little or no tubular morphology).

Uncoordinated movement: Unc (worms that fail to correctly move, that display poor forward movement or that fail to move backwards).

|                             | OP50     | Nonsself  | Self       | Self [A-] | Self subset |
|-----------------------------|----------|-----------|------------|-----------|-------------|
| Hatched progeny             | 2621     | 2862      | 3712       | 3084      | 4073        |
| No. Larval arrest/delay (%) | 5 (0.19) | 10 (0.35) | 138 (3.72) | 7 (0.23)  | 116 (2.85)  |
| No. Defective adults (%)    | 2 (0.08) | 16 (0.56) | 111 (2.99) | 8 (0.26)  | 51 (1.25)   |

Phenotypes of defective adults:

|                                |   |    |    |   |    |
|--------------------------------|---|----|----|---|----|
| Abnormal body length and shape | 1 | 13 | 72 | 7 | 26 |
| Abnormal vulva or gonad        | 0 | 3  | 26 | 1 | 14 |
| Uncoordinated movement         | 1 | 0  | 13 | 0 | 11 |

**Supplementary Table S4. Effects on progenies of wild type and *rde-1* mutant worms fed on self or nonsself libraries.**

Different letters indicate significant differences among combinations of genotype and diet within each dependent variable (table row), according to pairwise testing with Mann-Whitney U test at  $P < 0.05$ , on data expressed per worm.

| Genotype              | wt              | wt              | <i>rde-1</i>     | <i>rde-1</i>    |
|-----------------------|-----------------|-----------------|------------------|-----------------|
| Diet                  | Self            | Nonsself        | Self             | Nonsself        |
| Parental worms        | 8               | 6               | 8                | 6               |
| Laid eggs             | 1938            | 1501            | 1615             | 1609            |
| Dead embryos          | 35 <sup>b</sup> | 11 <sup>a</sup> | 29 <sup>b</sup>  | 12 <sup>a</sup> |
| Aberrant phenotypes   | 73 <sup>b</sup> | 27 <sup>a</sup> | 112 <sup>c</sup> | 45 <sup>a</sup> |
| - Larval arrest/delay | 27              | 12              | 37               | 16              |
| - Defective adults    | 46              | 15              | 75               | 29              |

**Supplementary Table S5. Effects on progenies of WT and *nuc-1* mutant worms fed on self or nonself libraries.**

Different letters indicate significant differences among combinations of genotype and diet within each dependent variable (table row), according to pairwise testing with Mann-Whitney U test at  $P < 0.05$ , on data expressed per worm.

| <b>Genotype</b>          | <b>wt</b>              | <b><i>nuc-1</i></b>     | <b><i>nuc-1</i></b>    | <b>wt</b>              | <b><i>nuc-1</i></b>    |
|--------------------------|------------------------|-------------------------|------------------------|------------------------|------------------------|
| <b>DIET</b>              | <b>Self</b>            | <b>Self</b>             | <b>Nonself</b>         | <b>Self subset</b>     | <b>Self subset</b>     |
| Parental worms           | 8                      | 10                      | 8                      | 8                      | 8                      |
| Laid eggs                | 1909                   | 2691                    | 2115                   | 2096                   | 1944                   |
| Dead embryos (%)         | 42 <sup>b</sup> (2.20) | 82 <sup>b</sup> (3.05)  | 14 <sup>a</sup> (0.66) | 67 <sup>b</sup> (3.20) | 50 <sup>b</sup> (2.57) |
| Aberrant phenotypes (%)  | 90 <sup>d</sup> (4.82) | 153 <sup>d</sup> (5.86) | 9 <sup>c</sup> (0.43)  | 98 <sup>d</sup> (4.83) | 92 <sup>d</sup> (4.86) |
| -Larval arrest/delay (%) | 39 (2.09)              | 92 (3.53)               | 5 (0.24)               | 47 (2.32)              | 47 (2.48)              |
| - Defective adults (%)   | 51 (2.73)              | 61 (2.34)               | 4 (0.19)               | 51 (2.51)              | 45 (2.38)              |

**Supplementary Table S6. Results of two-ways ANOVA testing for the effects of feeding treatment (either Self or Nonself), generation (four levels) and their interaction on the number of laid eggs per worm and the percent frequency of dead embryos and aberrant phenotypes in the progeny of *C. elegans* (see Fig. 2b-d in main text).**

| <b>Effect</b>                        | <b>df</b> | <b>SS</b> | <b>MS</b> | <b>F</b> | <b>P</b> |
|--------------------------------------|-----------|-----------|-----------|----------|----------|
| <i>Laid eggs per worm (n)</i>        |           |           |           |          |          |
| Treatment (T)                        | 1         | 52361     | 52361     | 22.27    | <0.0001  |
| Generation (G)                       | 3         | 20614     | 6871      | 2.92     | 0.0370   |
| T x G                                | 3         | 1157      | 386       | 0.16     | 0.9204   |
| Error                                | 114       | 268039    | 2351      |          |          |
| <i>Dead embryos (%)</i>              |           |           |           |          |          |
| Treatment (T)                        | 1         | 163.80    | 163.80    | 19.30    | < 0.0001 |
| Generation (G)                       | 3         | 19.64     | 6.55      | 0.77     | 0.5124   |
| T x G                                | 3         | 16.43     | 5.48      | 0.65     | 0.5875   |
| Error                                | 114       | 967.49    | 8.49      |          |          |
| <i>Total aberrant phenotypes (%)</i> |           |           |           |          |          |
| Treatment (T)                        | 1         | 11608.39  | 11608.39  | 147.56   | < 0.0001 |
| Generation (G)                       | 3         | 4940.93   | 1646.98   | 20.94    | < 0.0001 |
| T x G                                | 3         | 4964.64   | 1654.88   | 21.04    | < 0.0001 |
| Error                                | 114       | 8968.02   | 78.67     |          |          |

**Supplementary Table S7. Effects of parental feeding treatment with either Self or Nonself libraries on the number of laid eggs and percent frequency of dead embryos and aberrant phenotypes in the progeny of *C. elegans* across four different generations (see Fig. 2b-d in main text).** For each effect, treatment and generation, data refer to mean and 95% confidence interval calculated on a randomized, replicated sample (N ranging between = 9 to 29). Results of statistical analyses refer to significant pairwise differences between treatments or between generations, showed as P values resulting from Tukey's post-hoc HSD test for unequal sample sizes, after two-ways ANOVA shown in Table S6.

| Effects                 | Treatment | Generation  |              |               |             | Statistical analysis |           |           |           |                  |
|-------------------------|-----------|-------------|--------------|---------------|-------------|----------------------|-----------|-----------|-----------|------------------|
|                         |           | P0          | F1           | F2            | F3          | P                    | P         | P         | P         | P                |
|                         |           | P0 vs. F1   | F1 vs. F2    | F2 vs. F3     | P0 vs. F3   | Self vs. Nonself     |           |           |           |                  |
| Laid eggs per worm (n)  | Self      | 243         | 264          | 244           | 226         | 0.8525               | 0.9022    | 0.9924    | 0.9952    | 0.0002           |
|                         |           | (224 ÷ 262) | (235 ÷ 294)  | (221 ÷ 267)   | (176 ÷ 276) |                      |           |           |           |                  |
|                         | Nonself   | 291         | 317          | 278.4         | 272.6       | 0.9489               | 0.6989    | 0.9999    | 0.9896    |                  |
|                         |           | (280 ÷ 302) | (282 ÷ 352)  | (248 ÷ 309)   | (246 ÷ 299) |                      |           |           |           |                  |
|                         |           |             |              |               |             | P                    | P         | P         | P         | P                |
|                         |           |             |              |               |             | F1 vs. F2            | F2 vs. F3 | F3 vs. F4 | F1 vs. F4 | Self vs. Nonself |
| Dead embryos (%)        | Self      | 3.1         | 4.8          | 2.5           | 3.0         | 0.6447               | 0.2645    | 0.9999    | 0.9999    | 0.0002           |
|                         |           | (2.1 ÷ 4.2) | (2.0 ÷ 7.5)  | (1.6 ÷ 3.4)   | (1.9 ÷ 4.0) |                      |           |           |           |                  |
|                         | Nonself   | 0.9         | 0.9          | 0.7           | 0.8         | 0.9999               | 0.9999    | 0.9999    | 0.9999    |                  |
|                         |           | (0.5 ÷ 1.3) | (0.1 ÷ 1.6)  | (0.4 ÷ 1.0)   | (0.5 ÷ 1.1) |                      |           |           |           |                  |
| Aberrant phenotypes (%) | Self      | 5.7         | 14.3         | 26.2          | 42.5        | 0.0506               | 0.0019    | 0.0040    | 0.0001    | 0.0001           |
|                         |           | (3.9 ÷ 7.5) | (6.9 ÷ 21.8) | (22.5 ÷ 29.8) | (29 ÷ 55.9) |                      |           |           |           |                  |
|                         | Nonself   | 0.9         | 0.5          | 1.0           | 0.8         | 0.9999               | 0.9999    | 0.9999    | 0.9999    |                  |
|                         |           | (0.8 ÷ 1.0) | (0.2 ÷ 0.9)  | (0.2 ÷ 1.8)   | (0.3 ÷ 1.2) |                      |           |           |           |                  |

**Supplementary Table S8. Results of one-way ANOVA testing for significant diet- and worm genotype-differences on the average number of SYTO-12-labeled nuclei per gonadal arm (see Fig. 4d in main text).**

| Effect        | df  | SS      | MS     | F      | P       |
|---------------|-----|---------|--------|--------|---------|
| Diet/genotype | 2   | 204.68  | 102.34 | 23.377 | <0.0001 |
| Error         | 357 | 1562.86 | 4.38   |        |         |

**Supplementary Table S9. Effects of diet- and worm genotype-differences on the average number of SYTO-12-labeled nuclei per gonadal arm (see Fig. 4d in main text).** For each combination of diet and worm genotype, data refer to mean and 95% confidence interval calculated on a randomized, replicated sample ( $N \geq 90$ ). Results of statistical analyses refer to significant pairwise differences, showed as P values resulting from Tukey's post-hoc HSD test for unequal sample sizes, after one-way ANOVA shown in Supplementary Table S8.

| Effects                                           | Diet / genotype    |     |                    |    |                    |    | Statistical analysis    |                          |                             |
|---------------------------------------------------|--------------------|-----|--------------------|----|--------------------|----|-------------------------|--------------------------|-----------------------------|
|                                                   |                    |     |                    |    |                    |    | P                       | P                        | P                           |
|                                                   | wt / Self          | N   | cep-1 / Self       | N  | wt / Nonsself      | N  | wt/Self =<br>cep-1/Self | wt/Self =<br>wt/Nonsself | cep-1/Self =<br>wt/Nonsself |
| N of SYTO-12-labeled<br>nuclei per gonadal<br>arm | 5.1<br>(4.7 ÷ 5.4) | 180 | 3.5<br>(3.2 ÷ 3.8) | 90 | 3.6<br>(3.3 ÷ 3.9) | 90 | 0.000023                | 0.000032                 | 0.91885                     |
